# Supplementary material for: Ion-pairing chromatography on a porous graphitic carbon column coupled with time-of-flight mass spectrometry for targeted and untargeted profiling of amino acid biomarkers involved in Candida albicans biofilm formation
Source: Royal Society of Chemistry journal article supplement (doi:10.1039/c3mb70240e), 2013-10-03
Supplement: c3mb70240e.pdf [file c3mb70240e.pdf]

**Table S1** List of experimental parameters for amino acids and internal standards used for quantification

| Compound                                | Formula                                                                    | Selected ion       | Exact mass ( $m/z$ ) | Mass window   | IS used                                 |
|-----------------------------------------|----------------------------------------------------------------------------|--------------------|----------------------|---------------|-----------------------------------------|
| Glycine                                 | C <sub>2</sub> H <sub>5</sub> NO <sub>2</sub>                              | [M+H] <sup>+</sup> | 76.0393              | 76.03-76.05   | <sup>15</sup> N <sub>2</sub> -glutamine |
| Serine                                  | C <sub>3</sub> H <sub>7</sub> NO <sub>3</sub>                              | [M+H] <sup>+</sup> | 106.0499             | 106.04-106.06 | <sup>15</sup> N <sub>2</sub> -glutamine |
| Alanine                                 | C <sub>3</sub> H <sub>7</sub> NO <sub>2</sub>                              | [M+H] <sup>+</sup> | 90.0550              | 90.04-90.06   | <sup>15</sup> N <sub>2</sub> -glutamine |
| Hydroxyproline                          | C <sub>5</sub> H <sub>9</sub> NO <sub>3</sub>                              | [M+H] <sup>+</sup> | 132.0655             | 132.06-132.08 | <sup>15</sup> N <sub>2</sub> -glutamine |
| Threonine                               | C <sub>4</sub> H <sub>9</sub> NO <sub>3</sub>                              | [M+H] <sup>+</sup> | 120.0655             | 120.05-120.07 | <sup>15</sup> N <sub>2</sub> -glutamine |
| Asparagine                              | C <sub>4</sub> H <sub>8</sub> N <sub>2</sub> O <sub>3</sub>                | [M+H] <sup>+</sup> | 133.0608             | 133.05-133.07 | <sup>15</sup> N <sub>2</sub> -glutamine |
| Proline                                 | C <sub>5</sub> H <sub>9</sub> NO <sub>2</sub>                              | [M+H] <sup>+</sup> | 116.0706             | 116.07-116.09 | <sup>15</sup> N <sub>2</sub> -glutamine |
| Aspartic acid                           | C <sub>4</sub> H <sub>7</sub> NO <sub>4</sub>                              | [M+H] <sup>+</sup> | 134.0448             | 134.03-134.05 | <sup>15</sup> N <sub>2</sub> -glutamine |
| Glutamine                               | C <sub>5</sub> H <sub>10</sub> N <sub>2</sub> O <sub>3</sub>               | [M+H] <sup>+</sup> | 147.0764             | 147.06-147.08 | <sup>15</sup> N <sub>2</sub> -glutamine |
| <sup>15</sup> N <sub>2</sub> -glutamine | C <sub>5</sub> H <sub>10</sub> <sup>15</sup> N <sub>2</sub> O <sub>3</sub> | [M+H] <sup>+</sup> | 149.0705             | 149.06-149.08 | NA                                      |
| Ornithine                               | C <sub>5</sub> H <sub>12</sub> N <sub>2</sub> O <sub>2</sub>               | [M+H] <sup>+</sup> | 133.0972             | 133.09-133.11 | <sup>15</sup> N <sub>2</sub> -glutamine |
| Glutamic acid                           | C <sub>5</sub> H <sub>9</sub> NO <sub>4</sub>                              | [M+H] <sup>+</sup> | 148.0604             | 148.05-148.07 | <sup>15</sup> N <sub>2</sub> -glutamine |
| Valine                                  | C <sub>5</sub> H <sub>11</sub> NO <sub>2</sub>                             | [M+H] <sup>+</sup> | 118.0683             | 118.06-118.08 | <sup>13</sup> C <sub>6</sub> -lysine    |
| Citrulline                              | C <sub>6</sub> H <sub>13</sub> N <sub>3</sub> O <sub>3</sub>               | [M+H] <sup>+</sup> | 176.1030             | 176.10-176.11 | <sup>13</sup> C <sub>6</sub> -lysine    |
| Leucine                                 | C <sub>6</sub> H <sub>13</sub> NO <sub>2</sub>                             | [M+H] <sup>+</sup> | 132.1019             | 132.09-132.11 | <sup>13</sup> C <sub>6</sub> -lysine    |
| Lysine                                  | C <sub>6</sub> H <sub>14</sub> N <sub>2</sub> O <sub>2</sub>               | [M+H] <sup>+</sup> | 147.1128             | 147.11-147.13 | <sup>13</sup> C <sub>6</sub> -lysine    |
| <sup>13</sup> C <sub>6</sub> -lysine    | <sup>13</sup> C <sub>6</sub> H <sub>14</sub> N <sub>2</sub> O <sub>2</sub> | [M+H] <sup>+</sup> | 153.1329             | 153.13-153.15 | NA                                      |
| Methionine                              | C <sub>5</sub> H <sub>11</sub> NO <sub>2</sub> S                           | [M+H] <sup>+</sup> | 150.0583             | 150.05-150.07 | <sup>13</sup> C <sub>6</sub> -lysine    |

|                           |                                                                            |                    |          |               |                           |
|---------------------------|----------------------------------------------------------------------------|--------------------|----------|---------------|---------------------------|
| Isoleucine                | C <sub>6</sub> H <sub>13</sub> NO <sub>2</sub>                             | [M+H] <sup>+</sup> | 132.1019 | 132.09-132.11 | <sup>13</sup> C6-lysine   |
| Histidine                 | C <sub>6</sub> H <sub>9</sub> N <sub>3</sub> O <sub>2</sub>                | [M+H] <sup>+</sup> | 156.0768 | 156.07-156.08 | <sup>15</sup> N4-arginine |
| Arginine                  | C <sub>6</sub> H <sub>14</sub> N <sub>4</sub> O <sub>2</sub>               | [M+H] <sup>+</sup> | 175.1190 | 175.11-175.13 | <sup>15</sup> N4-arginine |
| <sup>15</sup> N4-arginine | C <sub>6</sub> H <sub>14</sub> <sup>15</sup> N <sub>4</sub> O <sub>2</sub> | [M+H] <sup>+</sup> | 179.1071 | 179.10-179.12 | NA                        |
| Phenylalanine             | C <sub>9</sub> H <sub>11</sub> NO <sub>2</sub>                             | [M+H] <sup>+</sup> | 166.0863 | 166.07-166.09 | <sup>15</sup> N4-arginine |
| Tyrosine                  | C <sub>9</sub> H <sub>11</sub> NO <sub>3</sub>                             | [M+H] <sup>+</sup> | 182.0812 | 182.07-182.09 | <sup>15</sup> N4-arginine |
| Tryptophan                | C <sub>11</sub> H <sub>12</sub> N <sub>2</sub> O <sub>2</sub>              | [M+H] <sup>+</sup> | 205.0972 | 205.09-205.11 | <sup>15</sup> N4-arginine |

**Table S2.** The primers used in this study

| Primer name | Sequence                                     |
|-------------|----------------------------------------------|
| P1          | TTGTTTTACCTGCCCAAAT                          |
| P2          | CACGGCGCGCCTAGCAGCGGGGTGGTTTTAGTGTTTGGTGA    |
| P3          | GTCAGCGGCCGCATCCTGCGTTGTGCAAGTACTAAATTCAATGG |
| P4          | TTTCGTCAACCAACCAACAA                         |
| P5          | CCGCTGCTAGGCGCGCCGTGAGCTCGGATCCACTAGTAACG    |
| P6          | GCAGGGATGCGGCCGCTGACGCCAGTGTGATGGATATCTGC    |

**Table S3** Retention time, linearity of calibration and limits of detection and quantification determined by the established LC-TOF/MS method (1  $\mu$ L injection)

| Compound       | Retention time | Linearity           |                                    |                | LOQ (ng mL <sup>-1</sup> ) | LOD (ng mL <sup>-1</sup> ) |
|----------------|----------------|---------------------|------------------------------------|----------------|----------------------------|----------------------------|
|                |                | Regression equation | Range ( $\mu$ g mL <sup>-1</sup> ) | R <sup>2</sup> |                            |                            |
| Glycine        | 2.356          | y=70.512x-0.1849    | 0.132-26.4                         | 0.9994         | 75                         | 20                         |
| Serine         | 2.606          | y=43.628x-0.2825    | 0.10625-42.5                       | 0.9978         | 30                         | 9                          |
| Alanine        | 3.472          | y=18.717x-0.0017    | 0.06575-26.3                       | 0.9997         | 26                         | 10                         |
| Hydroxyproline | 4.618          | y=6.5624x+0.128     | 0.02925-11.7                       | 0.9990         | 29                         | 8                          |
| Threonine      | 5.062          | y=6486x+0.1833      | 0.06325-25.3                       | 0.9996         | 42                         | 12                         |
| Asparagine     | 6.954          | y=11.741x+0.264     | 0.06275-25.1                       | 0.9991         | 13                         | 4                          |
| Proline        | 7.272          | y=9.4874x+0.135     | 0.0555-22.2                        | 0.9994         | 37                         | 10                         |
| Aspartic acid  | 7.297          | y=17.808x-1.4117    | 0.29125-116.5                      | 0.9972         | 23                         | 7                          |
| Glutamine      | 8.629          | y=16.534x-0.2103    | 0.09325-37.3                       | 0.9998         | 16                         | 5                          |
| Ornithine      | 9.857          | y=14.481x+0.4363    | 0.18325-73.3                       | 0.9996         | 52                         | 15                         |
| Glutamic acid  | 10.032         | y=21.094x-0.6104    | 0.34825-69.65                      | 0.9981         | 20                         | 6                          |
| Valine         | 10.582         | y=2.1155x+0.0224    | 0.21675-21.675                     | 0.9993         | 173                        | 50                         |
| Citrulline     | 12.628         | y=6.515x+0.3297     | 0.2875-57.5                        | 0.9992         | 15                         | 4                          |
| Leucine        | 13.225         | y=1.1891x-0.1812    | 0.14025-28.05                      | 0.9972         | 15                         | 5                          |
| Lysine         | 12.57          | y=12.277x-0.4584    | 0.2075-83                          | 0.9997         | 34                         | 10                         |
| Methionine     | 14.125         | y=3.114x-0.0371     | 0.02975-11.9                       | 0.9993         | 6                          | 2                          |

---

|               |        |                    |                |        |    |    |
|---------------|--------|--------------------|----------------|--------|----|----|
| Isoleucine    | 14.382 | $y=1.1626x-0.0053$ | 0.14475-28.95  | 0.9993 | 19 | 5  |
| Histidine     | 16.838 | $y=23.752x-1.0172$ | 0.19925-79.7   | 0.9982 | 17 | 5  |
| Arginine      | 18.815 | $y=20.454x-0.3498$ | 0.129875-51.95 | 0.9998 | 17 | 5  |
| Phenylalanine | 23.387 | $y=7.1124x-0.3228$ | 0.128-25.6     | 0.9986 | 11 | 3  |
| Tyrosine      | 23.960 | $y=15.11x-0.0781$  | 0.097-38.8     | 0.9996 | 13 | 4  |
| Tryptophan    | 30.287 | $y=27.753x+0.085$  | 0.065-13       | 0.9991 | 40 | 12 |

---



**Table S4** Intra- and inter-day precisions of 22 amino acids standard solutions at three different concentration levels

| Compound       | $\mu\text{g mL}^{-1}$ |        |        | Intra-day (n=3, RSD%) |        |      | Inter-day (n=3, RSD%) |        |      |
|----------------|-----------------------|--------|--------|-----------------------|--------|------|-----------------------|--------|------|
|                | high                  | middle | low    | high                  | middle | low  | high                  | middle | low  |
| Glycine        | 13.20                 | 2.640  | 0.6600 | 1.22                  | 0.98   | 0.42 | 2.15                  | 1.23   | 1.01 |
| Serine         | 10.62                 | 2.125  | 0.5312 | 0.68                  | 0.06   | 0.30 | 0.55                  | 1.33   | 0.89 |
| Alanine        | 6.575                 | 1.315  | 0.3287 | 2.06                  | 0.09   | 0.28 | 1.77                  | 1.28   | 0.67 |
| Hydroxyproline | 2.925                 | 0.585  | 0.1462 | 0.29                  | 0.04   | 0.10 | 0.83                  | 0.56   | 0.69 |
| Threonine      | 6.325                 | 1.265  | 0.3162 | 2.72                  | 0.24   | 0.34 | 0.24                  | 1.57   | 1.66 |
| Asparagine     | 6.275                 | 1.255  | 0.3137 | 0.75                  | 0.10   | 0.12 | 0.33                  | 0.48   | 0.90 |
| Proline        | 5.550                 | 1.110  | 0.2775 | 0.85                  | 0.10   | 0.07 | 0.98                  | 1.45   | 2.23 |
| Aspartic acid  | 29.12                 | 5.825  | 1.456  | 0.38                  | 0.23   | 0.66 | 0.56                  | 1.67   | 1.18 |
| Glutamine      | 9.321                 | 1.865  | 0.4662 | 2.99                  | 0.25   | 0.09 | 0.35                  | 0.83   | 0.72 |
| Ornithine      | 18.32                 | 3.665  | 0.9162 | 1.47                  | 0.15   | 0.24 | 2.97                  | 0.45   | 0.67 |

---

|               |       |       |        |      |      |      |      |      |      |
|---------------|-------|-------|--------|------|------|------|------|------|------|
| Glutamic acid | 34.82 | 6.965 | 1.741  | 3.15 | 0.40 | 2.32 | 1.63 | 2.09 | 0.45 |
| Valine        | 21.67 | 4.335 | 1.084  | 0.93 | 1.83 | 2.72 | 0.15 | 0.50 | 0.78 |
| Citrulline    | 28.75 | 5.750 | 1.437  | 2.19 | 0.32 | 0.89 | 1.40 | 0.29 | 0.22 |
| Leucine       | 14.02 | 2.805 | 0.7012 | 2.59 | 1.62 | 0.91 | 1.12 | 0.26 | 0.69 |
| Lysine        | 20.75 | 4.150 | 1.037  | 1.40 | 0.54 | 3.67 | 0.79 | 0.26 | 0.93 |
| Methionine    | 2.975 | 0.595 | 0.1487 | 1.97 | 0.15 | 1.38 | 1.12 | 1.02 | 0.83 |
| Isoleucine    | 14.47 | 2.895 | 0.7237 | 2.14 | 0.81 | 0.85 | 0.79 | 0.15 | 0.83 |
| Histidine     | 19.92 | 3.985 | 0.9962 | 1.24 | 0.15 | 1.14 | 0.65 | 0.76 | 0.09 |
| Arginine      | 12.99 | 2.595 | 0.6494 | 1.12 | 0.22 | 1.47 | 0.37 | 0.11 | 0.98 |
| Phenylalanine | 12.82 | 2.560 | 0.6400 | 1.21 | 0.05 | 1.36 | 0.95 | 0.59 | 0.08 |
| Tyrosine      | 9.701 | 1.940 | 0.4850 | 0.98 | 0.10 | 1.18 | 0.89 | 1.32 | 1.11 |
| Tryptophan    | 3.252 | 0.650 | 0.1625 | 0.40 | 0.11 | 0.22 | 0.52 | 0.43 | 0.34 |

---

**Table S5** Recovery experiment of the analytical method for 22 amino acids

| Compounds      | Sample<br>( $\mu\text{g mg}^{-1}$ ) | Spiked<br>( $\mu\text{g mg}^{-1}$ ) | Sample+spiked<br>( $\mu\text{g mg}^{-1}$ ) | Recovery(%) |
|----------------|-------------------------------------|-------------------------------------|--------------------------------------------|-------------|
| Glycine        | 2.242                               | 1.201                               | 3.499                                      | 104.7       |
| Serine         | 1.504                               | 1.932                               | 3.470                                      | 101.8       |
| Alanine        | 22.25                               | 1.195                               | 23.50                                      | 104.6       |
| Hydroxyproline | 0.571                               | 0.532                               | 1.025                                      | 85.34       |
| Threonine      | 1.780                               | 1.150                               | 2.916                                      | 98.78       |
| Asparagine     | 2.670                               | 1.141                               | 3.787                                      | 97.90       |
| Proline        | 4.635                               | 1.010                               | 5.587                                      | 94.26       |
| Aspartic acid  | 1.602                               | 5.295                               | 7.351                                      | 108.6       |
| Glutamine      | 14.52                               | 3.390                               | 18.17                                      | 107.7       |
| Ornithine      | 4.228                               | 3.332                               | 7.330                                      | 93.10       |
| Glutamic acid  | 48.77                               | 6.332                               | 55.30                                      | 103.1       |
| Valine         | 1.502                               | 3.941                               | 5.082                                      | 90.84       |
| Citrulline     | 1.321                               | 5.227                               | 5.856                                      | 86.76       |
| Leucine        | 1.469                               | 2.550                               | 3.734                                      | 88.82       |
| Lysine         | 11.63                               | 3.503                               | 15.26                                      | 103.6       |
| Methionine     | 0.133                               | 0.541                               | 0.690                                      | 103.0       |
| Isoleucine     | 2.555                               | 2.632                               | 5.111                                      | 97.11       |
| Histidine      | 1.815                               | 3.623                               | 5.597                                      | 104.4       |
| Arginine       | 2.132                               | 4.723                               | 6.591                                      | 94.41       |



|               |       |       |       |       |
|---------------|-------|-------|-------|-------|
| Phenylalanine | 0.121 | 2.327 | 2.678 | 109.9 |
| Tyrosine      | 1.700 | 1.764 | 3.163 | 82.94 |
| Tryptophan    | 0.558 | 0.590 | 1.082 | 88.81 |

---

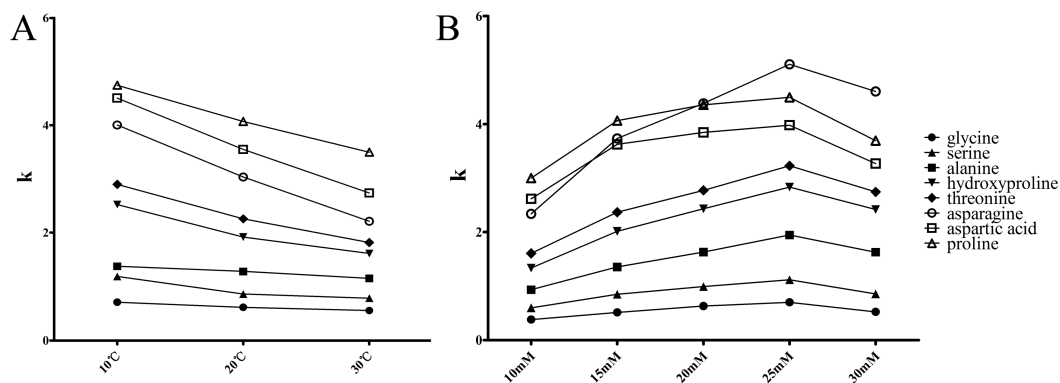

Fig. S1 (A) Influence of the column temperature using 15 mM NFA as IP buffer, and (B) the NFA concentration at 10 °C column temperature on the retention factor (k) of the first eight eluted underivatized amino acids.

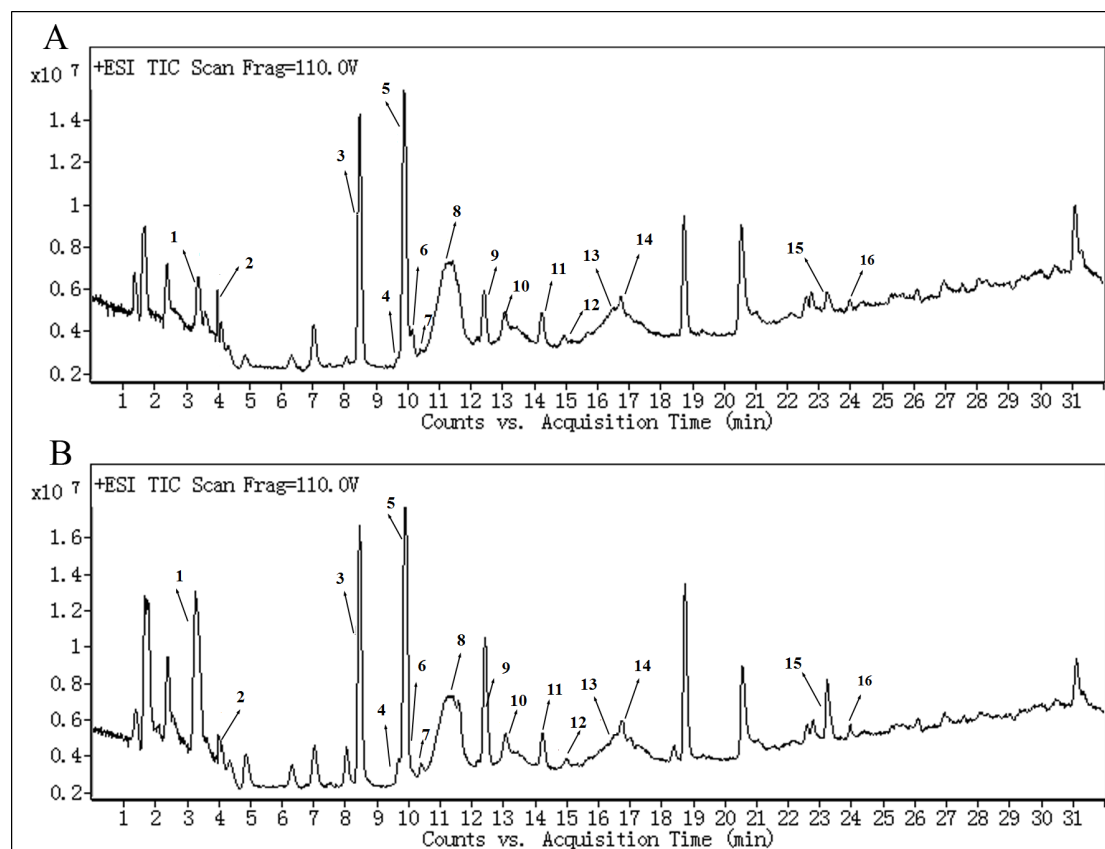

Fig. S2 Typical IP-PGC-TOF/MS total ion chromatograms (TIC) of *C. albicans* SC5314 (A) planktonic and (B) biofilm cells.

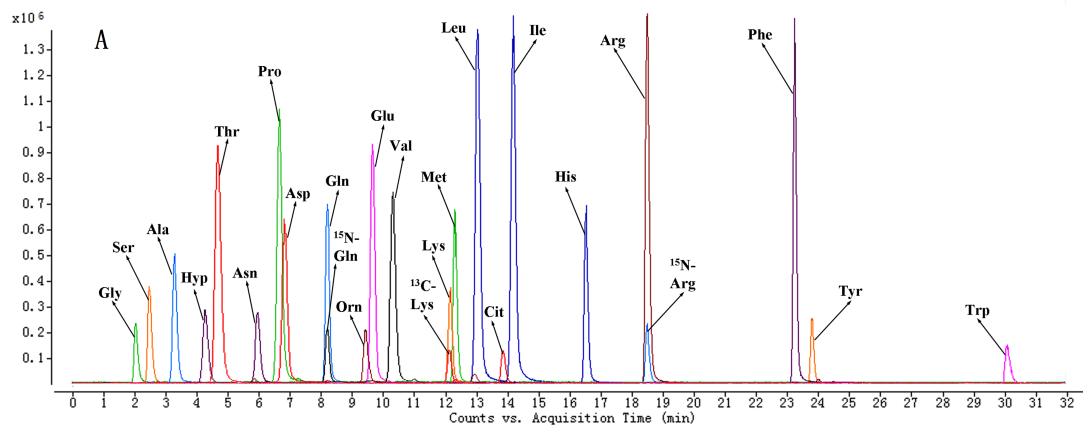

Fig. S3 Extracted ion chromatography (EIC) of 22 targeted amino acids and 3 internal standards.
